# Supplementary material for: Gut Health-Promoting Benefits of a Dietary Supplement of Vitamins with Inulin and Acacia Fibers in Rats
Source: PubMed Central journal article supplement (PMC7468733; doi:10.3390/nu12082196), 2020-07-23
Supplement: nutrients-12-02196-s001.pdf [file nutrients-12-02196-s001.pdf]

**Figure S1**



Figure S2



**Table S1**

| <b>Components</b>                  | <b>V</b> | <b>V+I</b> | <b>V+A</b> |
|------------------------------------|----------|------------|------------|
| Kcal/100 g                         | 110.82   | 114.10     | 110.90     |
| Proteins (%)                       | 9.45     | 8.90       | 8.80       |
| Carbohydrate (%)                   | 6.73     | 7.00       | 7.00       |
| Sugar (%)                          | 1.3      | 3.40       | 3.30       |
| Fat (%)                            | 4.9      | 4.50       | 4.50       |
| Saturated (%)                      | 0.94     | 0.86       | 0.87       |
| Fiber (g/100 g)                    | 1.0      | 4.50       | 4.50       |
| Soluble (g)                        | 0.15     | 4.50       | 3.40       |
| Sodium (mg/100 g)                  | 374,5    | 410.00     | 411.00     |
| Calcium (mg/100 g)                 | 140.00   | 140.00     | 170.00     |
| Iron (mg/100 g)                    | 2.30     | 2.40       | 3.10       |
| Selenium (mg/100 g)                | 0.005    | 0.005      | 0.005      |
| Zinc (mg/100 g)                    | 2.60     | 2.70       | 2.20       |
| Vitamin B <sub>6</sub> (mg/100 g)  | 0.38     | 0.31       | 0.35       |
| Vitamin B <sub>9</sub> (mg/100 g)  | 0.03     | 0.03       | 0.03       |
| Vitamin B <sub>12</sub> (mg/100 g) | <0.0004  | <0.0004    | <0.0003    |
| Vitamin D (mg/100 g)               | 0.0004   | 0.0005     | 0.0007     |
| Vitamin E (mg/100 g)               | 3.39     | 3.26       | 3.37       |

Table S2

| RELATIVE<br>WEIGHT (%)     | REF         |                          | V           |                          | V+I         |                          | V+A         |                          |
|----------------------------|-------------|--------------------------|-------------|--------------------------|-------------|--------------------------|-------------|--------------------------|
|                            | ♀           | ♂                        | ♀           | ♂                        | ♀           | ♂                        | ♀           | ♂                        |
| <b>Stomach</b>             | 0.52 ± 0.03 | 0.40 ± 0.02 <sup>a</sup> | 0.54 ± 0.04 | 0.44 ± 0.02              | 0.53 ± 0.01 | 0.41 ± 0.02 <sup>a</sup> | 0.49 ± 0.03 | 0.40 ± 0.03 <sup>a</sup> |
| <b>Duodenum</b>            | 0.16 ± 0.01 | 0.10 ± 0.01 <sup>a</sup> | 0.16 ± 0.01 | 0.11 ± 0.01 <sup>a</sup> | 0.17 ± 0.02 | 0.11 ± 0.01 <sup>a</sup> | 0.16 ± 0.01 | 0.11 ± 0.01 <sup>a</sup> |
| <b>Jejunum</b>             | 1.37 ± 0.02 | 0.97 ± 0.06 <sup>a</sup> | 1.24 ± 0.02 | 0.97 ± 0.04 <sup>a</sup> | 1.20 ± 0.09 | 0.94 ± 0.02 <sup>a</sup> | 1.25 ± 0.05 | 0.97 ± 0.03 <sup>a</sup> |
| <b>Ileum</b>               | 1.05 ± 0.07 | 0.77 ± 0.02 <sup>a</sup> | 1.10 ± 0.05 | 0.83 ± 0.05 <sup>a</sup> | 1.09 ± 0.02 | 0.84 ± 0.03 <sup>a</sup> | 0.96 ± 0.06 | 0.76 ± 0.05 <sup>a</sup> |
| <b>Cecum</b>               | 0.36 ± 0.04 | 0.32 ± 0.06              | 0.31 ± 0.03 | 0.31 ± 0.05              | 0.33 ± 0.04 | 0.33 ± 0.06              | 0.32 ± 0.04 | 0.28 ± 0.02              |
| <b>Colon &amp; rectum</b>  | 0.52 ± 0.04 | 0.53 ± 0.03              | 0.53 ± 0.05 | 0.41 ± 0.02              | 0.53 ± 0.02 | 0.38 ± 0.02 <sup>a</sup> | 0.48 ± 0.02 | 0.35 ± 0.03 <sup>a</sup> |
| <b>Spleen</b>              | 0.29 ± 0.02 | 0.23 ± 0.01 <sup>a</sup> | 0.31 ± 0.02 | 0.22 ± 0.01 <sup>a</sup> | 0.30 ± 0.02 | 0.24 ± 0.01 <sup>a</sup> | 0.28 ± 0.03 | 0.19 ± 0.02 <sup>a</sup> |
| <b>Liver</b>               | 3.67 ± 0.10 | 3.72 ± 0.09              | 3.59 ± 0.18 | 3.90 ± 0.19              | 3.39 ± 0.12 | 3.76 ± 0.13              | 3.66 ± 0.07 | 3.78 ± 0.09              |
| <b>Thymus</b>              | 0.22 ± 0.02 | 0.15 ± 0.01 <sup>a</sup> | 0.24 ± 0.01 | 0.13 ± 0.01 <sup>a</sup> | 0.23 ± 0.03 | 0.15 ± 0.01 <sup>a</sup> | 0.23 ± 0.01 | 0.15 ± 0.02 <sup>a</sup> |
| <b>Kidneys</b>             | 0.68 ± 0.01 | 0.55 ± 0.02 <sup>a</sup> | 0.66 ± 0.04 | 0.60 ± 0.03              | 0.63 ± 0.02 | 0.58 ± 0.02              | 0.62 ± 0.02 | 0.59 ± 0.02              |
| <b>Heart</b>               | 0.39 ± 0.01 | 0.31 ± 0.02 <sup>a</sup> | 0.39 ± 0.01 | 0.31 ± 0.01 <sup>a</sup> | 0.39 ± 0.01 | 0.31 ± 0.01 <sup>a</sup> | 0.36 ± 0.01 | 0.31 ± 0.01 <sup>a</sup> |
| <b>Submandibular gland</b> | 0.10 ± 0.02 | 0.07 ± 0.00              | 0.08 ± 0.00 | 0.01 ± 0.00 <sup>a</sup> | 0.08 ± 0.00 | 0.07 ± 0.00 <sup>a</sup> | 0.08 ± 0.01 | 0.07 ± 0.00              |

**Table S3**

|                        |                                  | <b>REF</b>     | <b>V</b>       | <b>V+I</b>                 | <b>V+A</b>     |
|------------------------|----------------------------------|----------------|----------------|----------------------------|----------------|
| <b>WBC<sup>a</sup></b> | <b>GB (x10<sup>9</sup>/L)</b>    | 5.81 ± 0.75    | 5.33 ± 0.62    | 4.94 ± 0.56                | 5.98 ± 0.79    |
|                        | <b>LYM (%)</b>                   | 57.40 ± 1.85   | 60.82 ± 1.73   | 55.94 ± 2.04               | 56.74 ± 2.08   |
|                        | <b>MID (%)</b>                   | 7.08 ± 0.22    | 7.26 ± 0.16    | 7.45 ± 0.20                | 7.38 ± 0.21    |
|                        | <b>GRAN (%)</b>                  | 35.52 ± 1.79   | 31.84 ± 1.64   | 36.26 ± 2.20               | 34.88 ± 2.68   |
|                        | <b>LYM# (x10<sup>9</sup>/L)</b>  | 3.37 ± 0.53    | 3.20 ± 0.38    | 2.67 ± 0.31                | 3.41 ± 0.55    |
|                        | <b>MID# (x10<sup>9</sup>/L)</b>  | 0.37 ± 0.06    | 0.34 ± 0.05    | 0.29 ± 0.04                | 0.40 ± 0.06    |
|                        | <b>GRAN#(x10<sup>9</sup>/L)</b>  | 2.07 ± 0.20    | 1.81 ± 0.22    | 1.93 ± 0.26                | 2.17 ± 0.22    |
| <b>RBC<sup>b</sup></b> | <b>GR (x10<sup>12</sup>/L)</b>   | 7.22 ± 0.15    | 7.03 ± 0.14    | 7.37 ± 0.10                | 7.24 ± 0.18    |
|                        | <b>HGB (g/dL)</b>                | 12.72 ± 0.26   | 12.44 ± 0.20   | 12.48 ± 0.13               | 12.44 ± 0.10   |
|                        | <b>HCT (%)</b>                   | 39.10 ± 0.87   | 37.69 ± 0.99   | 40.06 ± 0.51               | 38.93 ± 0.79   |
|                        | <b>MCV (fL)</b>                  | 54.27 ± 0.94   | 54.06 ± 0.69   | 54.45 ± 0.81               | 54.25 ± 1.02   |
|                        | <b>MCH (pg)</b>                  | 17.58 ± 0.26   | 17.82 ± 0.21   | 16.38 ± 0.49 <sup>*β</sup> | 17.30 ± 0.44   |
|                        | <b>MCHC (g/dL)</b>               | 32.50 ± 0.28   | 33.13 ± 0.54   | 31.12 ± 0.47 <sup>*β</sup> | 31.99 ± 0.62   |
|                        | <b>RDW-CV (%)</b>                | 11.30 ± 0.20   | 11.40 ± 0.16   | 10.30 ± 1.02               | 11.65 ± 0.15   |
|                        | <b>RDW-SD (fL)</b>               | 20.37 ± 0.33   | 20.28 ± 0.23   | 20.61 ± 0.14               | 20.74 ± 0.34   |
| <b>Platelet</b>        | <b>PLQ (x10<sup>9</sup>/L)</b>   | 365.44 ± 34.23 | 351.83 ± 16.08 | 351.80 ± 17.51             | 331.40 ± 42.12 |
|                        | <b>MPV (fL)</b>                  | 9.47 ± 0.38    | 9.15 ± 0.22    | 9.64 ± 0.27                | 10.08 ± 0.70   |
|                        | <b>PDW (fL)</b>                  | 10.53 ± 0.57   | 9.62 ± 0.34    | 11.01 ± 0.59               | 10.58 ± 0.61   |
|                        | <b>PCT (%)</b>                   | 0.33 ± 0.03    | 0.32 ± 0.01    | 0.33 ± 0.02                | 0.30 ± 0.03    |
|                        | <b>P-LCR (%)</b>                 | 11.07 ± 1.31   | 9.75 ± 0.94    | 11.64 ± 0.97               | 11.57 ± 1.27   |
|                        | <b>P-LCC (x10<sup>9</sup>/L)</b> | 37.67 ± 3.87   | 34.28 ± 2.77   | 40.80 ± 4.19               | 32.62 ± 3.83   |

<sup>a</sup>WBC= White Blood Cells; <sup>b</sup>RBC= Red Blood Cells.

White blood cell count (**GB**); Lymphocyte percentage (**LYM**); Monocyte percentage (**MID**); Granulocyte percentage (**GRA**); Lymphocyte count (**LYM#**); Monocyte count (**MID#**); Granulocyte count (**GRA#**); Red blood cell count (**GR**); Hemoglobin concentration (**HGB**); Hematocrit (**HCT**); Mean Corpuscular Volume (**MCV**); Mean Corpuscular Hemoglobin (**MCH**); Mean Corpuscular Hemoglobin Concentration (**MCHC**); Red Blood Cell Distribution width Repeat Precision (**RDW-CV**); Red Blood Cell Distribution Width STDEV (**RDW-SD**); Platelet count (**PLT#**), Mean platelet volum (**MPV**); Platelet distribution width (**PDW**); Plateletcrit (**PCT**); Large platelet ratio (**P-LCR**); Large platelet (**P\_LCC**).
